# Supplementary material for: Western Dietary Pattern Is Associated with Irritable Bowel Syndrome in the French NutriNet Cohort
Source: MDPI journal article supplement (doi:10.3390/nu9090986), 2017-09-07
Supplement: s1 [file s1]

**Supplemental Table S2.** Adjusted association between dietary profiles and irritable bowel syndrome (IBS) after the removal of other functional gastrointestinal disorders than IBS cases (n=39,298)

|             |          |    | Q1   |      | Q2        |      | Q3        |      | Q4        |      | Q5        |             |  |
|-------------|----------|----|------|------|-----------|------|-----------|------|-----------|------|-----------|-------------|--|
|             |          |    |      | OR   | 95%CI     | OR   | 95%CI     | OR   | 95%CI     | OR   | 95%CI     | p for trend |  |
| Healthy     | Men      | n* | 63   | 76   |           | 80   |           | 93   |           | 79   |           |             |  |
|             | Model 1† |    | Ref. | 1.21 | 0.86-1.71 | 1.28 | 0.91-1.79 | 1.49 | 1.08-2.07 | 1.24 | 0.88-1.74 | 0.10        |  |
|             | Model 2‡ |    | Ref. | 1.15 | 0.82-1.62 | 1.18 | 0.84-1.66 | 1.39 | 1.00-1.94 | 1.19 | 0.83-1.70 | 0.20        |  |
|             | Women    | n* | 239  | 315  |           | 318  |           | 347  |           | 389  |           |             |  |
|             | Model 1† |    | Ref. | 1.17 | 0.99-1.40 | 1.09 | 0.92-1.30 | 1.13 | 0.96-1.35 | 1.19 | 1.00-1.41 | 0.13        |  |
|             | Model 2‡ |    | Ref. | 1.12 | 0.94-1.34 | 1.04 | 0.87-1.24 | 1.09 | 0.92-1.30 | 1.16 | 0.98-1.39 | 0.17        |  |
| Western     | Men      | n* | 53   | 80   |           | 70   |           | 96   |           | 92   |           |             |  |
|             | Model 1† |    | Ref. | 1.52 | 1.07-2.17 | 1.31 | 0.91-1.89 | 1.80 | 1.67-2.56 | 1.66 | 1.14-2.42 | <0.01       |  |
|             | Model 2‡ |    | Ref. | 1.51 | 1.06-2.15 | 1.29 | 0.89-1.86 | 1.74 | 1.22-2.48 | 1.64 | 1.12-2.41 | <0.01       |  |
|             | Women    | n* | 367  | 372  |           | 314  |           | 307  |           | 248  |           |             |  |
|             | Model 1† |    | Ref. | 1.13 | 0.97-1.31 | 1.07 | 0.92-1.26 | 1.22 | 1.04-1.44 | 1.23 | 1.02-1.47 | 0.02        |  |
|             | Model 2‡ |    | Ref. | 1.13 | 0.98-1.32 | 1.09 | 0.93-1.27 | 1.25 | 1.06-1.47 | 1.30 | 1.08-1.57 | <0.01       |  |
| Traditional | Men      | n* | 72   | 83   |           | 68   |           | 85   |           | 83   |           |             |  |
|             | Model 1† |    | Ref. | 1.16 | 0.84-1.60 | 0.93 | 0.66-1.32 | 1.16 | 0.82-1.63 | 1.08 | 0.73-1.58 | 0.74        |  |
|             | Model 2‡ |    | Ref. | 1.18 | 0.85-1.64 | 0.98 | 0.69-1.40 | 1.25 | 0.88-1.78 | 1.23 | 0.82-1.85 | 0.24        |  |
|             | Women    | n* | 248  | 275  |           | 315  |           | 368  |           | 402  |           |             |  |
|             | Model 1† |    | Ref. | 0.99 | 0.83-1.18 | 1.07 | 0.89-1.27 | 1.18 | 0.99-1.41 | 1.21 | 1.00-1.46 | <0.01       |  |
|             | Model 2‡ |    | Ref. | 0.99 | 0.83-1.19 | 1.09 | 0.92-1.31 | 1.24 | 1.04-1.48 | 1.30 | 1.07-1.59 | <0.001      |  |

\* Number of subjects suffering from IBS within each sex-specific quintile of dietary profiles

†Adjusted for: age at inclusion, total energy intake.

‡ Adjusted for: model 1 + educational level, body mass index, income level, smoking status, physical activity, season of inclusion, time between inclusion and completion of FGID questionnaire and other DPs.
