# Supplementary material for: Western Dietary Pattern Is Associated with Irritable Bowel Syndrome in the French NutriNet Cohort
Source: MDPI journal article supplement (doi:10.3390/nu9090986), 2017-09-07
Supplement: s1 [file s1]

**Supplemental Table S4.** Comparison of daily intake in micronutrients between quintiles (Q) of western pattern (N=44,350)

|              | Q1     |       | Q2     |       | Q3     |       | Q4     |       | Q5     |       | p       |
|--------------|--------|-------|--------|-------|--------|-------|--------|-------|--------|-------|---------|
|              | mean   | SD    |         |
| Calcium      | 1025.2 | 2.86  | 917.7  | 2.80  | 877.0  | 2.77  | 853.0  | 2.80  | 809.2  | 3.05  | <0.0001 |
| Beta caroten | 4350.6 | 29.37 | 3533.2 | 28.79 | 3168.2 | 28.47 | 2906.5 | 28.76 | 2380.7 | 31.33 | <0.0001 |
| Iron         | 14.1   | 0.05  | 13.5   | 0.05  | 13.1   | 0.05  | 12.9   | 0.05  | 12.1   | 0.05  | <0.0001 |
| Potassium    | 3441.9 | 6.75  | 3025.3 | 6.61  | 2845.2 | 6.54  | 2716.2 | 6.61  | 2518.9 | 7.20  | <0.0001 |
| Magnesium    | 371.6  | 1.20  | 344.1  | 1.17  | 332.6  | 1.16  | 322.1  | 1.17  | 301.6  | 1.28  | <0.0001 |
| Sodium       | 2971.1 | 9.46  | 2943.4 | 9.27  | 2918.9 | 9.17  | 2871.1 | 9.26  | 2809.8 | 10.09 | <0.0001 |
| Phosphorus   | 1408.2 | 3.14  | 1279.2 | 3.08  | 1227.4 | 3.05  | 1187.7 | 3.08  | 1132.3 | 3.35  | <0.0001 |
| Vitamin A    | 1201.7 | 9.72  | 1076.8 | 9.53  | 1020.7 | 9.42  | 995.2  | 9.52  | 908.4  | 10.37 | <0.0001 |
| Vitamin B1   | 1.3    | 0.01  | 1.2    | 0.01  | 1.1    | 0.01  | 1.1    | 0.01  | 1.1    | 0.01  | <0.0001 |
| Vitamin B2   | 2.0    | 0.01  | 1.7    | 0.01  | 1.6    | 0.01  | 1.6    | 0.01  | 1.5    | 0.01  | <0.0001 |
| Vitamin B3   | 20.5   | 0.06  | 18.8   | 0.06  | 18.2   | 0.06  | 17.7   | 0.06  | 16.9   | 0.07  | <0.0001 |
| Vitamin B5   | 5.9    | 0.01  | 5.3    | 0.01  | 5.0    | 0.01  | 4.9    | 0.01  | 4.6    | 0.01  | <0.0001 |
| Vitamin B6   | 2.0    | 0.01  | 1.8    | 0.01  | 1.7    | 0.01  | 1.6    | 0.01  | 1.5    | 0.01  | <0.0001 |
| Vitamin B9   | 376.5  | 1.09  | 326.9  | 1.07  | 307.9  | 1.06  | 292.3  | 1.07  | 270.2  | 1.16  | <0.0001 |
| Vitamin B12  | 5.9    | 0.06  | 5.4    | 0.06  | 5.2    | 0.06  | 5.0    | 0.06  | 4.7    | 0.06  | <0.0001 |
| Vitamin C    | 133.1  | 0.75  | 113.7  | 0.74  | 105.9  | 0.73  | 101.0  | 0.74  | 96.1   | 0.80  | <0.0001 |
| Vitamin D    | 3.0    | 0.03  | 2.8    | 0.03  | 2.7    | 0.03  | 2.6    | 0.03  | 2.4    | 0.03  | <0.0001 |
| Vitamin E    | 12.1   | 0.05  | 11.3   | 0.05  | 10.9   | 0.04  | 10.6   | 0.05  | 10.1   | 0.05  | <0.0001 |
| Zinc         | 11.5   | 0.03  | 10.9   | 0.03  | 10.5   | 0.03  | 10.2   | 0.03  | 9.6    | 0.03  | <0.0001 |

ANCOVA tests controlled for gender, age and total energy intake

Abbreviations: SD standard deviation
