# Supplementary material for: Western Dietary Pattern Is Associated with Irritable Bowel Syndrome in the French NutriNet Cohort
Source: MDPI journal article supplement (doi:10.3390/nu9090986), 2017-09-07
Supplement: s1 [file s1]

**Supplemental Table S1.** Food grouping used in the dietary patterns (n=29)

| <b>Food groups</b>                    | <b>Food items</b>                                                                                                                    |
|---------------------------------------|--------------------------------------------------------------------------------------------------------------------------------------|
| Vegetable fat                         | Oils and margarine                                                                                                                   |
| Animal fat                            | Butter and other animal fat (goose or duck fat)                                                                                      |
| Sauces                                | Salad dressings, mayonnaise, and all types of sauces (béchamel, roquefort sauce, ...)                                                |
| Cakes, cookies, pastries and desserts | Cakes, cookies, pastries, dairy desserts and ice cream                                                                               |
| Confectionery                         | Candy, sweets, honey, jam, sugar, syrup, sherbet, sweetened condensed milk                                                           |
| Cheese                                | Including low fat cheese                                                                                                             |
| Dairy products                        | Yogurts and <i>petits suisses</i> with less than 12% sugar                                                                           |
| Milk                                  | Any mammalian milk                                                                                                                   |
| Dried fruits                          | Dried fruits and natural oleaginous fruits                                                                                           |
| Fruits                                | Fruits                                                                                                                               |
| Fruits and vegetables juices          | 100% fruits or vegetables juices without added sugar                                                                                 |
| Vegetables                            | Any type of vegetables                                                                                                               |
| Legumes                               | Any type of beans, lentils, lupins, peas, chickpeas, soy protein, tofu and tempeh                                                    |
| Potatoes and tubers                   | Potatoes and other tubers (cassava, sweet potato, yam, chestnut, plantain...)                                                        |
| Starches                              | Pastas, rice, semolina and flour                                                                                                     |
| Bread                                 | Bread and rusks                                                                                                                      |
| Sweet cereals                         | Sweet breakfast cereals and cereal bars                                                                                              |
| Breakfast cereals                     | Low sugared breakfast cereals                                                                                                        |
| Whole grains                          | Wholemeal pasta, brown rice, wholemeal flour, wholemeal bread, wholegrain                                                            |
| Meat, ham                             | Beef, veal, lamb, mutton, pork, wild boar, rabbit, hare, horse and pork or poultry ham                                               |
| Organ meat                            | Sausages, brains, hearts, livers, tongues, feet, sweetbreads, kidneys, viscera                                                       |
| Poultry                               | Any kind of poultry (chicken, turkey, duck, goose...)                                                                                |
| Processed meat and fish               | Terrines, pâtés, rillettes, sausage from meat or fish                                                                                |
| Eggs                                  | Eggs                                                                                                                                 |
| Fish and seafood                      | Any kind of fish and shellfish                                                                                                       |
| Salty snacks                          | Crackers, pretzels, chips, taco, crackers, cheese puffs, hummus, Tarama, small toasts                                                |
| Alcoholic beverages                   | Any beverage with an alcohol content                                                                                                 |
| Sweetened beverages                   | High-sugar fruit juices, sodas, lemonade, sweetened drinks without alcohol, syrup, ice tea, sweetened flavoured water and hot drinks |
| Non sugared beverages                 | Water (still and sparkling), light and diet drinks and unsweetened hot drinks                                                        |
