# Supplementary material for: Western Dietary Pattern Is Associated with Irritable Bowel Syndrome in the French NutriNet Cohort
Source: MDPI journal article supplement (doi:10.3390/nu9090986), 2017-09-07
Supplement: s1 [file s1]

**Supplemental Table S3.** Comparison of daily intake of macronutrients between quintiles (Q) of western pattern (N=44,350)

|                             | Q1     |      | Q2     |      | Q3     |      | Q4     |      | Q5     |      |         |
|-----------------------------|--------|------|--------|------|--------|------|--------|------|--------|------|---------|
|                             | mean   | SD   |         |
| Total energy intake (Kcal)  | 1814.0 | 4.85 | 1861.9 | 4.76 | 1922.1 | 4.69 | 2027.8 | 4.68 | 2272.2 | 4.77 | <0.0001 |
| % energy from carbohydrates | 42.8   | 0.08 | 42.0   | 0.08 | 41.5   | 0.08 | 41.0   | 0.08 | 40.3   | 0.08 | <0.0001 |
| % energy from lipids        | 35.3   | 0.07 | 37.5   | 0.07 | 38.4   | 0.07 | 39.1   | 0.07 | 39.9   | 0.07 | <0.0001 |
| % energy from proteins      | 19.6   | 0.04 | 17.5   | 0.04 | 16.6   | 0.04 | 15.8   | 0.04 | 14.9   | 0.04 | <0.0001 |
| MUFA                        | 28.0   | 0.08 | 29.0   | 0.08 | 29.2   | 0.08 | 29.4   | 0.08 | 29.4   | 0.08 | <0.0001 |
| PUFA                        | 11.2   | 0.05 | 11.1   | 0.05 | 11.0   | 0.04 | 10.8   | 0.05 | 10.6   | 0.05 | <0.0001 |
| SFA                         | 28.5   | 0.09 | 31.2   | 0.09 | 32.4   | 0.08 | 33.4   | 0.09 | 34.7   | 0.09 | <0.0001 |
| Cholesterol                 | 306.3  | 1.40 | 304.2  | 1.37 | 308.9  | 1.35 | 308.5  | 1.37 | 315.4  | 1.49 | <0.0001 |
| Omega 3                     | 1.6    | 0.01 | 1.4    | 0.01 | 1.3    | 0.01 | 1.3    | 0.01 | 1.2    | 0.01 | <0.0001 |
| Omega 6                     | 9.0    | 0.04 | 9.0    | 0.04 | 9.0    | 0.04 | 8.9    | 0.04 | 8.8    | 0.05 | 0.02    |
| Animal proteins             | 60.9   | 0.19 | 54.4   | 0.18 | 51.9   | 0.18 | 50.0   | 0.18 | 48.2   | 0.20 | <0.0001 |
| Vegetal proteins            | 26.2   | 0.07 | 25.4   | 0.07 | 24.9   | 0.07 | 24.2   | 0.07 | 22.5   | 0.08 | <0.0001 |
| Complex carbohydrates       | 104.7  | 0.30 | 107.0  | 0.30 | 106.1  | 0.30 | 103.7  | 0.30 | 98.6   | 0.32 | <0.0001 |
| Simple carbohydrates        | 92.4   | 0.29 | 86.8   | 0.29 | 85.0   | 0.29 | 85.4   | 0.29 | 86.5   | 0.31 | <0.0001 |
| Fibers                      | 22.8   | 0.07 | 20.2   | 0.07 | 18.9   | 0.06 | 17.8   | 0.07 | 15.7   | 0.07 | <0.0001 |
| % energy from alcohol       | 1.9    | 0.04 | 2.7    | 0.04 | 3.3    | 0.04 | 3.9    | 0.04 | 4.7    | 0.04 | <0.0001 |
| Water                       | 2351.6 | 6.67 | 2107.9 | 6.54 | 2020.6 | 6.47 | 1962.4 | 6.53 | 1867.8 | 7.12 | <0.0001 |

ANCOVA tests controlled for gender, age, total energy intake except for total energy intake, lipids, proteins and carbohydrates

Abbreviations: MUFA Mono-unsaturated fatty acid; PUFA Poly-unsaturated Fatty Acid; SFA Saturated Fatty Acid; SD standard deviation
