# Supplementary material for: Western Dietary Pattern Is Associated with Irritable Bowel Syndrome in the French NutriNet Cohort
Source: Nutrients. 2017 Sep 7;9(9):986. doi: 10.3390/nu9090986 (PMC5622746; doi:10.3390/nu9090986)
Supplement: Supplementary file 1 [file nutrients-09-00986-s001.zip]

Archive with 4 entries (4 files):
- Supplemental table S1.pdf
- Supplemental table S2.pdf
- Supplemental table S3.pdf
- Supplemental table S4.pdf
